# Supplementary material for: A new paradigm on the chemical potentials of components in multi-component nano-phases within multi-phase systems
Source: Royal Society of Chemistry journal article supplement (doi:10.1039/c7ra07911g), 2017-01-01
Supplement: c7ra07911g1.pdf [file c7ra07911g1.pdf]

## Electronic Supplement to the paper

### A New Paradigm on the Chemical Potentials of Components in Multi-component Nano-Phases within Multi-phase Systems

by George Kaptay, published in RSC Advances

#### Supplement A. Some simple examples of nano-equilibria

First let us suppose that the nano-phase is a liquid ( $\alpha = l$ ), which is surrounded by a large vapor phase ( $\beta = v$ ). The chemical potential of component  $i$  in this vapor phase ( $\mu_{i(v)}$ , J/mol) is written as:

$$\mu_{i(v)} = \mu_{i(v)}^o + R \cdot T \cdot \ln\left(\frac{p_i}{p^o}\right) \quad (\text{A1a})$$

where  $\mu_{i(v)}^o$  (J/mol) is the standard chemical potential of component  $i$  in the vapor phase, corresponding to the standard pressure of  $p^o = 10^5$  Pa,  $R = 8.3145$  J/molK is the universal gas constant,  $T$  (K) is the absolute temperature,  $p_i$  (Pa) is the partial pressure of component  $i$  in equilibrium with the liquid nano-droplet. The latter can be obtained by substituting Eq-s (2) of the main text) and the above Eq.(A1a) into Eq.(1) of the main text:

$$p_i = p_i^\infty \cdot \exp\left[\frac{z \cdot V_{m,i(l)} \cdot \sigma_{l/v}}{R \cdot T}\right] \quad (\text{A1b})$$

$$p_i^\infty = p^o \cdot \exp\left[\frac{\mu_{i(l)}^b - \mu_{i(v)}^o}{R \cdot T}\right] \quad (\text{A1c})$$

where  $p_i^\infty$  (Pa) is the equilibrium vapor pressure of component  $i$  above a large liquid phase with  $r = \infty$ ,  $r$  (m) is the radius of the liquid droplet. Eq.(A1b) is a generalized Kelvin equation. If  $z = 2/r$  is substituted into Eq.(A1b), the classical Kelvin equation is obtained in accordance with the Kelvin paradigm. If  $z = A_{sp,\alpha}$  from Eq.(8g) and parameters of Table 1 are substituted into Eq.(A1b), the new equations according to the new paradigm are obtained (see Table 2). Please, note: Eq.(A1b) can be applied also to calculate the equilibrium vapor pressure around a solid nano-phase, if  $\mu_{i(l)}^b$  is replaced by  $\mu_{i(s)}^b$  in Eq.(A1c) and if subscripts “ $l$ ” are replaced by subscripts “ $s$ ” in Eq.(A1b).

Now, suppose that the nano-phase is a pure solid phase ( $\alpha = s$ ), which is surrounded by a large liquid phase ( $\beta = l$ ). The chemical potential of a diluted component  $i$  in this large liquid phase ( $\mu_{i(l)}$ , J/mol) is written as:

$$\mu_{i(l)} = \mu_{i(l)}^o + R \cdot T \cdot \ln x_{i(l)} + L_o \quad (\text{A2a})$$

where  $x_{i(l)}$  (dimensionless) is the mole fraction of component  $i$  in the diluted liquid solution,  $L_o$  (J/mol) is the interaction energy between components  $i$  and  $j$  in the liquid solution. The bulk chemical potential of component  $i$  in a one-component solid nano-phase is written as the standard chemical potential of a pure solid phase:

$$\mu_{i(s)}^b = \mu_{i(s)}^o \quad (\text{A2b})$$

Substituting Eq-s (A2a-b, 2) into Eq.(1), the equilibrium solubility of the pure solid component  $i$  in the liquid  $i$ - $j$  solution is expressed as:

$$x_{i(l)} = x_{i(l)}^\infty \cdot \exp\left[\frac{z \cdot V_{m,i(s)} \cdot \sigma_{s/l}}{R \cdot T}\right] \quad (\text{A2c})$$

$$x_{i(l)}^\infty = \exp\left[\frac{\mu_{i(s)}^o - \mu_{i(l)}^o - L_o}{R \cdot T}\right] \quad (\text{A2d})$$

where  $x_{i(l)}^\infty$  (dimensionless) is the equilibrium solubility of a large pure solid phase  $i$  in the liquid solution. Eq.(A2c) is a generalized Ostwald-Freundlich equation. If  $z = 2/r$  is substituted into Eq.(A2c), the classical Freundlich equation is obtained, in accordance with the Kelvin paradigm. If  $z = A_{sp,\alpha}$  from Eq.(8g) and parameters of Table 1 are substituted into Eq.(A2c), the new equations according to the new paradigm are obtained, which are also in agreement with the Ostwald equation (see Table 2).

Suppose that the nano-phase is a pure solid phase ( $\alpha = s$ ), which is surrounded by a large pure liquid phase ( $\beta = l$ ). The chemical potential of component  $i$  in this large liquid phase ( $\mu_{i(l)}$ , J/mol) is written as:

$$\mu_{i(l)}^b = H_{i(l)}^o - T \cdot S_{i(l)}^o \quad (\text{A3a})$$

where  $H_{i(l)}^o$  (J/mol) is the standard enthalpy of pure liquid phase  $i$ ,  $S_{i(l)}^o$  (J/molK) is the standard entropy of pure liquid phase  $i$ . The bulk chemical potential of component  $i$  in a solid nano-phase is written as:

$$\mu_{i(s)}^b = H_{i(s)}^o - T \cdot S_{i(s)}^o \quad (\text{A3b})$$

Substituting Eq-s (A3a-b, 2) into Eq.(1), the equilibrium melting point of the solid nano-phase ( $T_{m,i}$ , K) can be expressed as:

$$T_{m,i} \cong T_{m,i}^\infty - \frac{z \cdot V_{m,i(s)} \cdot \sigma_{s/l}}{\Delta_m S_i^o} \quad (\text{A3c})$$

where  $T_{m,i}^{\infty}$  is the standard melting point of the large solid phase,  $\Delta_m S_i^o \equiv S_{i(l)}^o - S_{i(s)}^o$  (J/molK) is the standard melting entropy of pure phase  $i$ . When Eq.(A3c) is derived, the chemical potential difference between pure liquid and solid phases is written approximately as:  $\mu_{i(l)}^b - \mu_{i(s)}^b \cong \Delta_m S_i^o \cdot (T_{m,i}^{\infty} - T)$ . Eq.(A3c) is a generalized Gibbs-Thomson equation. If  $z = 2/r$  is substituted into Eq.(A3c), the classical Gibbs-Thomson equation is obtained, in accordance with the Kelvin paradigm. If  $z = A_{sp,\alpha}$  from Eq.(8g) and parameters of Table 1 are substituted into Eq.(A3c), the new equations according to the new paradigm are obtained (see Table 2). Let us mention that the solid/liquid equilibrium can also take place in other morphologies, leading to different equations, among which Eq.(A3c) is only the simplest one (for details see [25, 31]).

### Supplement B. On the ratio of surface atoms / molecules in nano-phases

Let us denote the mole fraction of surface atoms / molecules to all atoms / molecules within a nano-phase by  $x_s$  (dimensionless), defined as:

$$x_s \equiv \frac{N_s}{N} \quad (B1)$$

where  $N$  (dimensionless) is the number of all atoms / molecules within the nano-phase,  $N_s$  (dimensionless) is the number of atoms / molecules in the surface monolayer of the nano-phase. These quantities can be written as:

$$N = \frac{V_{\alpha}}{V_{m,\alpha}} \cdot N_{Av} \quad (B2)$$

$$N_s = \frac{A_{\alpha}}{\omega_{\alpha}} \cdot N_{Av} \quad (B3)$$

where  $N_{Av} = 6.023 \cdot 10^{23}$  1/mol is the Avogador number,  $\omega_{\alpha}$  (m<sup>2</sup>/mol) is the molar surface area of phase  $\alpha$ . Substituting Eq-s (B2-3) into Eq.(B1) and taking into account the definition written by Eq.(4f), the final equation is obtained as:

$$x_s = A_{sp,\alpha} \cdot \frac{V_{m,\alpha}}{\omega_{\alpha}} \quad (B4)$$

As follows from Eq.(B4), the ratio of surface atoms / molecules in a nano-phase is proportional to the specific surface area of the nano-phase. Eq.(B4) is the same as Eq.(9) of the main text.
